# Supplementary material for: 2-Phenyl-N-tosylazetidine as a formal 1,4 dipole precursor
Source: Royal Society of Chemistry journal article supplement (doi:10.1039/b101168p), 2001-01-01
Supplement: b101168p.doc [file b101168p.doc]

Supporting Information

**2-Phenyl-N-Tosylazetidine as a formal 1,4 Dipole Precursor.****

Ioana Ungureanu, Philippe Klotz, Angèle Schoenfelder and André Mann*

Laboratoire de Pharmacochimie de la Communication Cellulaire, UMR 7081, Faculté de Pharmacie, 74 route du Rhin, BP 24, F-67401 Illkirch, France

Email Address : andre.mann@pharma.u-strasbg.fr

Tel : 00 33 3 88 67 68 86

Fax : 00 33 3 88 67 47 94

**General Methods**: All the reaction were performed using oven dried glassware under an atmosphere of argon. Methylene chloride was purified over activated alumina under an argon atmosphere. All reagents were purchased and used without further purification The 1H and 13C NMR spectra were recorded on DPX-200 or DPX-300 (Brucker). The ESI mass spectra were performed on a Perkin Elmer Biospec apparatus. Chromatographic purification of products was performed using the "flash" technic (Still, W. C.; Kahn, M.; Mitra, A. J. *J. Org. Chem* **1978**, *43*, 2923) with Kieselgel Silica Gel 60 (40-63 mesh, Merck). TLC plates were stained using either ceric ammonium molybdate or anisaldehyde stain. The single crystals X-ray analyses have been performed by the "Service Commun de Radiocrystallograpphie" from the Université Louis Pasteur 2, rue Blaise Pascal ,F-67008. Strasbourg

Preparation of compound **2** and **3**

To a mixture of azetidine **1** (100 mg, 0.35 mmol) and allylsilane (0.53 mmol, 1.5 eq.) in CH2Cl2 cooled at -78°C, was added a solution of BF3.Et2O (0.1ml, 0.8 ml, 2.3 eq ) in CH2Cl2 (2 ml). The cooling bath is then removed and when the reaction mixture has reached the room temperature, CH2Cl2 (5 ml) was added. Then the aqueous phase was extracted with CH2Cl2 (3X10 ml), and the organic layer was washed with satured brine and dried (Na2SO4). After evaporation in vacuo of the solvant, the residue was purified by chromatography on silica gel eluting with hexane/ether: 2/1. Two compounds were obtained **2** (60 mg, 52%) and **3** (36 mg, 26%; mixture of two diastereomers A and B).

**N-(3-Phenyl-hex-5-enyl)-4-methylbenzenesulfonamide 2**.

Rf = 0.31 (hexane/ether 1/1); 1H NMR (300 MHz, CDCl3, 25°C, TMS): = 7.67 (d, 2H, *J* 8.4 Hz), 7.38-7.12 (m, 5H), 7.11-7.02 (m, 2H), 5.68-5.52 (m, 1H), 5.01-4.89 (m, 2H), 4.57 (m, 1H), 2.88-2.61 (m, 3H), 2.43 (s, 3H), 2.34-2.26 (m, 2H), 1.96-1.81 (m, 1H), 1.76-1.63 (m, 1H)

13C NMR (75 MHz, CDCl3, 25°C, TMS): =143.7, 143.4, 137.1, 136.4, 129.8, 128.7, 127.7, 127.2, 126.6, 116.6, 43.1, 41.6, 41.3, 35.6, 21.7.

SM (ESI) m/z[M+H+] : 330

**1-(4-Toluenesulfonyl)-2-(trimethylsilylmethyl)-4-phenyl-piperidine 3** : two dia's A (*trans*) and B (*cis*).

Rf = 0.61 (hexane/ether 1/1); 1H NMR (300 MHz, CDCl3, 25°C, TMS):  =7.83-7.76 (m, 4H), 7.41-7.15 (m, 10H), 7.12-6.98 (m, 4H), 4.52-4.39 (m, 1H, dia A), 3.98-3.85 (m, 1H, dia A), 3.84-3.60 (m, 2H, dia A and B), 3.53-3.38 (m, 1H, dia B), 3.22 (ddd, 1H, *J* 2.8, 12.8 and 15.9 Hz, dia A), 2.89 (ddd, 1H, *J* 3.9, 8.3 and 12.3 Hz, dia A), 2.49 and 2.48 (2s, 6H), 2.47-2.24 (m, 1H, dia B), 2.08-1.88 (m, 2H, dia B), 1.84-1.43 (m, 6H), 1.38-1.09 (m, 3H), 0.79 (m, 0.79) 0.08 and 0.03 (2s, 18H). Also COSY and HMQC experiments were performed.

13C NMR (75 MHz, CDCl3, 25°C, TMS): =145.3, 143.1, 138.1, 129.7, 128.7, 126.9, 126.9, 126.6, 126.5, 55.7 (dia B), 51.2 (dia A), 42.5 (dia B), 40.2 (dia A), 39.3 (dia B), 38.8, 37.8, 36.1 (dia A), 32.3, 31.7, 21.7, 18.5, -0.6, -0.9.

SM (ESI) m/z[M+H+] : 402

Preparation of compounds **4a**, **4b**, **5**

*General procedure*

To mixture of azetidine **1** (780 mg, 2.72 mmol) and dihydropyrane (DHP) (0.9 g, 10.7 mmol, 3.9 eq) in CH2Cl2 (15 ml) cooled at -78°C was added dropwise a solution of BF3.OEt2 (0.3ml, 1.8 mmol, 0.7 eq.) in CH2Cl2 (5 ml). The progress of the reaction was monitored by TLC (hex/ether: 1/1). At the disparition of azetidine H2O was added (10 ml) and the mixture was allowed to reach the room temperature. Then the mixture was extracted by CH2Cl2 (3X20 ml), the organic layer washed with saturated brine and dried (Na2SO4). The solvant was concentrated *in vacuo*, and the residue purified by column chromatography eluting with ether/hexane: 4/1to yield **4a** (580 mg, 57%), **4b** (68 mg, 7%) and **5** (380 Mg, 31%).

Transformation of **5** to **4a.**

A solution of the enamine **5** (360 mg, 0.79 mmol) in a mixture of toluene (20 ml), MeOH (10 ml) and p-toluenelsulfonic acid (0.17 mmol, 0.2 eq) was refuxed for 4 h. The solvent was evaporated *in vacuo* and the residue was taken in CH2Cl2 (20 ml). The organic layer was washed at neutrality with aqueous Na2CO3, with saturated brine, dried with Na2SO4 and evaporated *in vacuo*. The residue was purified by column chromatography eluting with hexane/ether: 1/1 to give **4a** (280 mg, 96%)

**5-exo-Phenyl-8-(4-toluenesulfonyl)-octahydro-pyrano[2,3-b]pyridine 4a.**

Rf = 0.47 (hexane/ether 1/1); 1H NMR (500 MHz, CDCl3, 25°C, TMS): =7.76 (ddd, 2H, *J* 2, 3.7 and 8.5 Hz), 7.38-7.19 (m, 5H), 7.16-7.11 (m, 2H), 5.37 (d, 1H, J 2.5 Hz), 3.89 (dd, 1H, J 4.8 and 11.4 Hz), 3.63 (dddd, 1H, *J* 2.6, 4.5, 7.1 and 11.4 Hz), 3.56 (ddd, 1H, *J* 1, 2.5 and 12.5 Hz), 3.03 (ddd, 2H, *J* 4.2, 12 and 16.1 Hz), 2.91 (ddd, 1H, *J* 3.4, 11.9 and 15 Hz), 2.42 (s, 3H), 2.01 (m, 1H), 1.92 (ddd, *J* 4.5, 13 and 17.6 Hz), 1.89-1.82 (m 1H), 1.71-1.57 (m, 1H), 1.56-1.42 (m, 2H), 1.19-1.12 (m, 1H).

13C NMR (75 MHz, CDCl3, 25°C, TMS): =146.9, 143.8, 143.7, 136.7, 129.6, 129.6, 129.1, 128.6, 127.8, 127.1, 84.6, 68.3, 41.8, 40.8, 38.9, 33.8, 25.9, 21.9, 20.4.

COSY, ROESY and HMQC experiments were performed

SM (ESI) m/z [M+H+]: 372

**5-endo-Phenyl-8-(4-toluenesulfonyl)-octahydro-pyrano[2,3-b]pyridine 4b**

Rf = 0.40 (hexane/ether 1/1); 1H NMR (200 MHz, CDCl3, 25°C, TMS): =7.82 (d, 2H, J 8.2Hz), 7.48-7.04 (m, 7H), 4.25 (d, 1H, *J* 3.7 Hz), 4.18-3.98 (m, 2H), 3.71-3.56 (m, 1H), 2.76 (ddd, 1H, J 4.4, 7.9 and 11.7 Hz), 2.57 (ddd, 1H, *J* 3.2, 11.5 and 11.7), 2.42 (s, 3H), 2.38-2.18 (m, 1H), 2.16-2.03 (m, 1H), 1.97-1.12 (m, 5H).

13C NMR (50 MHz, CDCl3, 25°C, TMS): =144.1, 142.2, 132.9, 129.8, 129.6, 128.8, 127.8, 126.9, 87, 63.5, 47.2, 44.2, 42.5, 25.2, 24.6, 22, 19.5.

COSY, NOESYand HMQC experiments were performed

**1-(4-toluenesulfonyl)-1,2,3,4-tetrahydro-4-phenyl-5-[3-(tetrahydropyran-2-yloxy)-propyl]pyridine 5.**

Rf = 0.37 (hexane/ether 1/1); 1H NMR (300 MHz, CDCl3, 25°C, TMS): =7.72 (d, 2H, *J* 8.3 Hz), 7.37 (d, 2H, J 8.3 Hz), 7.21-7.05 (m, 3H), 6.82-6.71 (m, 2H), 6.74 (d, 1H, J 2.3 Hz), 4.52 (brs, 1H), 3.91-3.80 (m, 1H), 3.72-3.61 (m, 1H), 3.53-3.42 (m, 2H), 3.33-3.23 (m, 2H), 3.02-2.92 (m, 1H), 2.49 (s, 3H), 2.02-1.45 (m, 14H).

13C NMR (75 MHz, CDCl3, 25°C, TMS): =144, 13.7, 134.8, 130.1, 128.7, 128.5, 127.7, 126.9, 122.3, 121.7, 121.6, 99.5, 99.2, 67.3, 62.9, 62.8, 40.5, 40.2, 31.1, 30.6, 30.4, 28.4, 25.9, 23.1, 21.9, 20.1.

COSY and HMQC experiments were performed.

SM (ESI)M/z [M+Na+]: 478.

Preparation of compounds **6**, **7** and **8**.

*General procedure*

To a cooled (-78°C) mixture of azetidine **1** (210 mg, 0.73 mmol) and methylenecycloalcane (0.83 mmol, 1.1eq) in CH2Cl2 (5 ml) was added a solution of BF3.Et2O (1 ml, 0.83 mmol, 1.1eq) in CH2Cl2 (2 ml). After 1 h stirring at -78°C, the mixture is quenched with H2O ( 3 ml) and allowed to reach room temperature. Then CH2Cl2 (5 ml) is added. The aqueous layer was extracted with CH2Cl2 (3X10 ml). The organic layer was washed with satured brine, dried (Na2SO4) and concentrated in *vacuo*. The residue was purified by column chromatography over silica gel eluting with hexane/ether 2/1 yielding the spiro adduct.

**5-(4-toluenesulfonyl)-8-phenyl-5-azaspiro[3.5]nonane 6.**

1H NMR (300 MHz, CDCl3, 25°C, TMS): (d, 2H, *J* 8.4 Hz), 7.38-7.14 (m, 7H), 4.12 (ddd, 1H, *J* 2.5, 4.1 and 6.5 Hz), 3.04-2.91 (m, 3H), 2.46 (m, 3H), 2.29-2.16 (m, 1H), 2.10-2.03 (m, 1H), 1.98-1.57 (m, 7H).

13C NMR (75 MHz, CDCl3, 25°C, TMS): =145.3, 142.9, 141.2, 129.8, 127.2, 126.9, 126.6, 61.2, 44.2, 39.5, 32.9, 31.5, 21.7, 14.7.

COSY, HMQC and HMBC were performed.

SM (ESI) m/z [M+H+]: 356.

**6-(4-toluenesulfonyl)-9-phenyl-6-azaspiro[4.5]decane 7**.

1H NMR (300 MHz, CDCl3, 25°C, TMS): =7.75 (d, 2H, *J* 8.3 Hz), 7.37-7.12 (m, 7H), 4.38 (ddd, 1H, *J* 3.8, 3.8 and 6.4 Hz), 3.31-3.20 (m, 1H), 3.01-2.83 (m, 1H), 2.45 (s, 3H), 2.44-2.39 (m, 1H), 2.23-2.11 (m, 1H), 1.94-1.45 (m, 10H).

13C NMR (75 MHz, CDCl3, 25°C, TMS): =145.7, 143.1, 141.7, 129.9, 129.8, 127.4, 127.2, 126.9, 69.1, 46.4, 41.7, 43.1, 39.7, 38.1, 35.3, 33.7, 23.5, 28.7, 22.6, 27.8, 21.9.

COSY and HMQC were performed.

SM (ESI- m/z [M+H+]: 370

**1-(4-toluenesulfonyl)-4-phenyl-1-azaspiro[5.5]undecane 8.**

1H NMR (200 MHz, CDCl3, 25°C, TMS): =7.76 (d, 2H, *J* 8.3Hz), 7.39-7.12 (m, 7H), 4.33 (ddd, 1H, *J* 2.9, 4.4 and 7.6 Hz), 3,52-3.34 (m, 1H), 2.84 (ddd, 1H, *J* 3.7, 7.6 and 12.5 Hz), 2.44 (s, 3H,), 2.46-2.20 (m, 2H), 2.01-1.02 (m, 12H).

13C NMR (50 MHz, CDCl3, 25°C, TMS): = 145.9, 142.9, 142.1, 129.9, 129, 127.3, 127.2, 126.9, 62.8, 43.2, 40.1, 37.8, 33.9, 30.3, 25.8, 23, 22.9, 21.7.

SM 5ESI) m/z [M+H+]: 384.

Preparation of compounds **9**, **10**, **11**

*General procedure*

To a cooled (-78°C) mixture of azetidine **1** (290 mg, 1 mmol) and cycloalkene 1.2 mmol, 1.2 eq) in CH2Cl2 (5 ml) was added a solution of BF3.Et2O (1 ml, 0.83 mmol, 1.1 eq) in CH2Cl2 (2 ml). After 1 h stirring at -78°C, the mixture was quenched with H2O ( 3 ml) and allowed to reach room temperature. Then CH2Cl2 (5 ml) was added, the aqueous layer was extracted with CH2Cl2 (3X10 ml). The organic layer was washed with satured brine, dried (Na2SO4) and concentrated in *vacuo*. The residue was purified by column chromatography over silica gel eluting with hexane/ether 2/1 yielding the spiro adduct.

**1-(4-toluenesulfonyl)-4-phenyl-1-azaspiro[4.4]nonane 9.**

Rf = 0.51 (hexane/ether 1/1); 1H NMR (300 MHz, CDCl3, 25°C, TMS): =7.79 (d, 2H, *J* 8.2 Hz), 7.32 (d, 2H, *J* 8.1 Hz), 7.29-7.12 (m, 3H), 7.10-7.02 (m, 2H), 3.62 (ddd, 1H, *J* 5.3, 9.4 and 14.7 Hz), 3.56-3.47 (m, 1H), 3.04 (dd, 1H, *J* 6.8 and 7.5 Hz), 2.45 (s, 3H), 2.52-2.37 (m, 1H), 2.39-2.12 (m, 2H), 2.11-2.01 (m, 1H), 1.91-1.78 (m, 2H), 1.61-1.51 (m, 2H), 0.91-0.71 (m, 1H).

13C NMR (75 MHz, CDCl3, 25°C, TMS): =142.5, 140, 138.9, 129.8, 129.6, 128.8, 127.9, 127.4, 127.2, 127.1, 77.6, 56.3, 47.4, 38, 33.9, 29, 24.7, 24.3, 21.7.

COSY and HMQC were performed.

SM (ESI) m/z [M+H+): 356.

**1-(4-toluenesulfonyl)-4-phenyl-1-azaspiro[4.5]decane 10.**

Rf = 0.53 (hexane/ether 1/1); 1H NMR (300 MHz, CDCl3, 25°C, TMS): =7.82 (d, 2H, *J* 8.4 Hz), 7.32 (d, 2H, J 8.1 Hz), 7.21-7.15 (m, 3H), 6.98-6.82 (m, 2H), 3.8 (ddd, 1H, *J* 2.5, 10 and 12.5 Hz, 3.61 (dd, 1H, *J* 9.4 and 20 Hz), 3.41 (d, 1H, *J* 7.5 Hz), 2.46 (s 3H), 2.53-2.32 (m, 2H), 2.09 (ddd, 1H, *J* 4.1, 7.3 and 17.5 Hz), 1.91-1.68 (m, 3H), 1.62-1.09 (m, 5H), 1.02-0.82 (m, H).

13C NMR (75 MHz, CDCl3, 25°C, TMS): =142.9, 142.6, 139.5, 129.6, 128.5, 128.3, 127.2, 126.6, 72.6, 50.5, 47.6, 36.9, 31.5, 29.8, 25.2, 24.9, 23.6, 21.7.

COSY and HMQC experiments were performed.

Anal. calcd for C22H27NO2S: C 71.51; H 7.36; N 3.79. Found C 71.8; N 7.6; H 3.7.

**1-(4-toluenesulfonyl)-4-phenyl-1-azaspiro[4.6]undecane 11.**

Rf = 0.54 (hexane/ether 1/1); 1H NMR (200 MHz, CDCl3, 25°C, TMS): =7.83 (d, 2H, *J* 8.3 Hz), 7.39-7.03 (m, 7H), 3.79 (m, 2H), 3.16 (dd, 1H, *J* 6.6 Hz), 2.49 (s, 3H), 2.43-2.18 (m, 3H), 2.10-1.82 (m, 3H), 1.78-1.36 (m, 7H).

13C NMR (75 MHz, CDCl3, 25°C, TMS): =142.8, 141.4, 139.4, 129.5, 128.4, 127.3, 126.9, 75.7, 55.8, 47.9, 40, 30.5, 28.8, 24.3, 23.9, 21.7.

COSY, HMQC

SM (ESI) m/z [M+Na+]: 384.

X-Ray experimental Data and diagrams.

*X-ray experimental data for* **4a.**

Formula : C21 H25 N O3 S

Molecular weight : 371.50

Cristal system : triclinic

Space group : P-1

a(Å) : 7.6170 (4)

b(Å) : 11.0840 (6)

c(Å) : 12.3600 (6)

(deg) : 86.392 (4)

(deg) : 73.642 (4)

(deg) : 78.942 (4)

V(Å3) : 982.9

Z : 2

Color : colorless

Crystal dim (mm) : 0.20*0.16*0.08

DCalc (gcm-3) : 1.26

F000 : 396

(mm-1) : 0.184

temperature (K) : 294

Wavenlegth (Å) : 0.71073

Radiation : MoK graphite monochromated

diffractometer : Kappa CCD

Scan mode : ' and  scan's

hkl limits : 0,9/-13,14/-15,16

Theta limits (deg) : 2.5/27.58

Number of data meas. : 10796

Number of data with I>3 (I) : 3037

Weighting scheme : 4Fo2/2(Fo2)+0.0004Fo4) + 1.0

Number of variables : 235

R : 0.044

R : 0.057

GOF : 1.295

Largest peak in final : 0.211

difference( eÅ-3)

Diagram of **5-exo-Phenyl-8-(4-toluenesulfonyl)-octahydro-pyrano[2,3-b]pyridine 4a.**

*X-ray experimental data for* **10.**

Formula : C22 H27 N O2 S

Molecular weight : 369.59

Cristal system : monoclinic

Space group : P 1 21/n 1

a(Å) : 9.4881 (3)

b(Å) : 18.6503 (8)

c(Å) : 11.1767 (5)

(deg) : 90

(deg) : 101.626 (8)

(deg) : 90

V(Å3) : 1937.2

Z : 4

Color : colorless

Crystal dim (mm) : 0.20*0.16*0.12

DCalc (gcm-3) : 1.27

F000 : 792

(mm-1) : 0.183

temperature (K) : 293

Wavenlegth (Å) : 0.71073

Radiation : MoK graphite monochromated

diffractometer : Kappa CCD

Scan mode : ' and  scan's

hkl limits : -12,12/-24,22/-14,14

Theta limits (deg) : 2.5/27.49

Number of data meas. : 8028

Number of data with I>3 (I) : 2079

Weighting scheme : 4Fo2/2(Fo2)+0.0064Fo4)

Number of variables : 235

R : 0.046

R : 0.067

GOF : 1.213

Largest peak in final : 0.284

difference( eÅ-3)

Diagram of **1-(4-toluenesulfonyl)-4-phenyl-1-azaspiro[4.5]decane 10.**
